# Supplementary material for: Magnetotactic bacteria AMB-1 with active deep tumor penetrability for magnetic hyperthermia of hypoxic tumors
Source: Royal Society of Chemistry journal article supplement (doi:10.1039/d2bm01029a), 2022-01-01
Supplement: d2bm01029a1.pdf [file d2bm01029a1.pdf]

## Supporting Information

### Magnetotactic Bacteria AMB-1 with Active Deep Tumor Penetrability for Magnetic Hyperthermia of Hypoxic Tumor

*Xin Chen,<sup>†</sup> Liwen Lai,<sup>†</sup> Xiang Li,<sup>†</sup> Xintong Cheng,<sup>†</sup> Xinxin Shan,<sup>†</sup> Xiangqing Liu,<sup>†</sup> Liqun Chen,<sup>†\*</sup>*

*Guangliang Chen,<sup>‡,§\*</sup> and Guoming Huang<sup>†\*</sup>*

<sup>†</sup>College of Biological Science and Engineering, Fuzhou University, Fuzhou 350116, P. R. China

<sup>‡</sup>Department of Radiology, Fujian Medical University Union Hospital, Fuzhou 350001, P. R.  
China

<sup>§</sup>The School of Medical Technology and Engineering, Fujian Medical University, Fuzhou 350108,  
P. R. China

## Supporting Figures

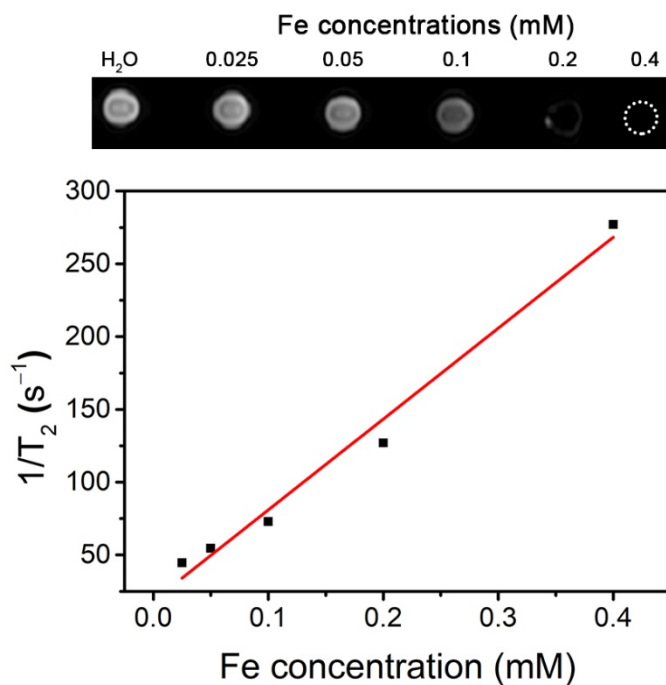

**Fig. S1.**  $T_2$ -weighted phantom images and linear fitting plot of longitudinal relaxation rates versus Fe concentrations for AMB-1 at 3 T.

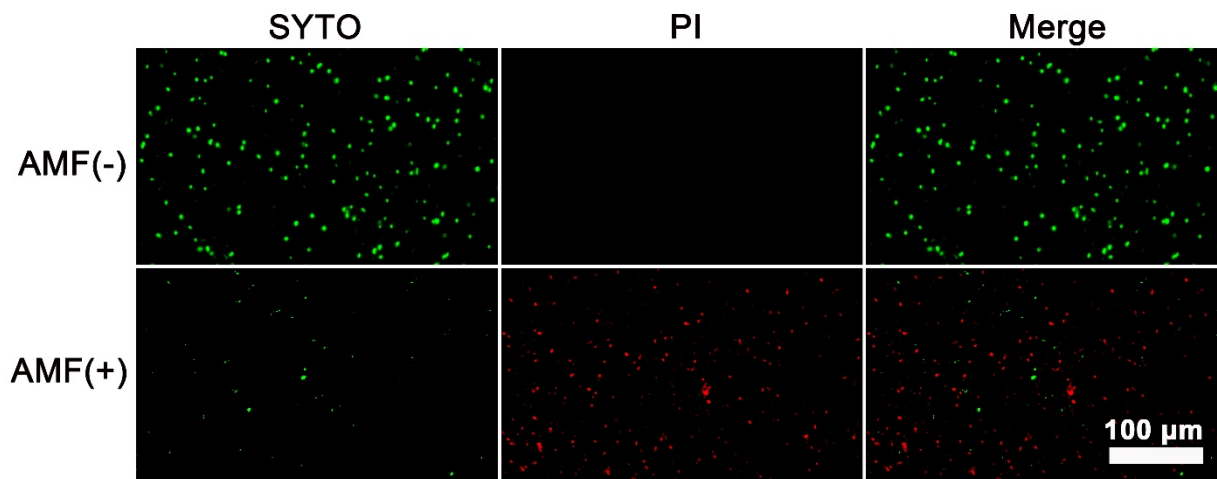

**Fig. S2.** SYTO and PI co-stained fluorescence images of AMB-1 with and without the treatment of AMF.

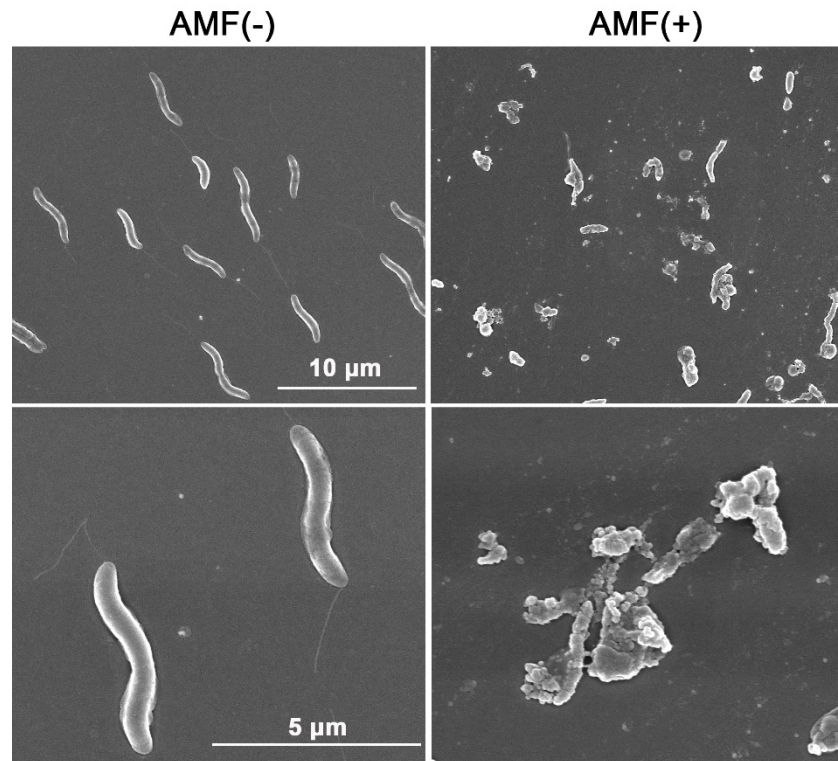

**Fig. S3.** SEM images of AMB-1 with and without the treatment of AMF.

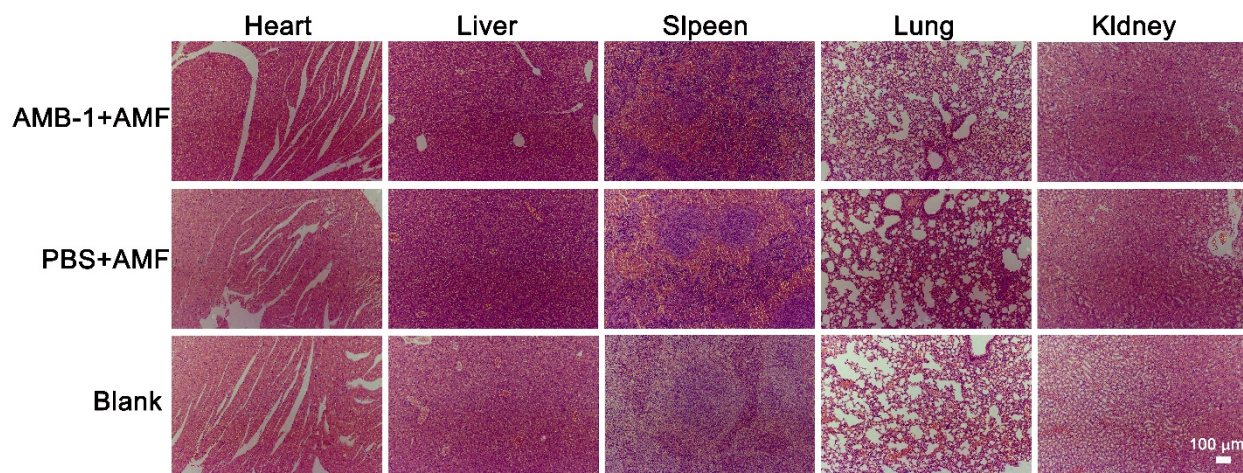

**Fig. S4.** H&E staining images of major organs of mice after different treatments.

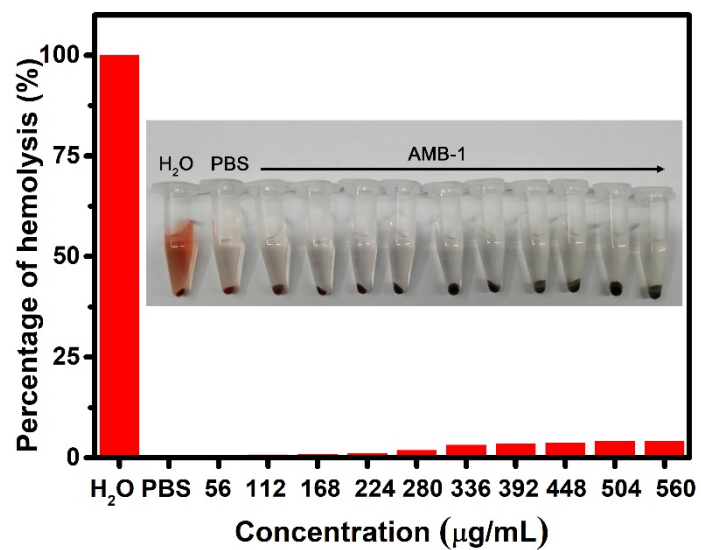

**Fig. S5.** Hemolysis assay of AMB-1 with different concentrations.

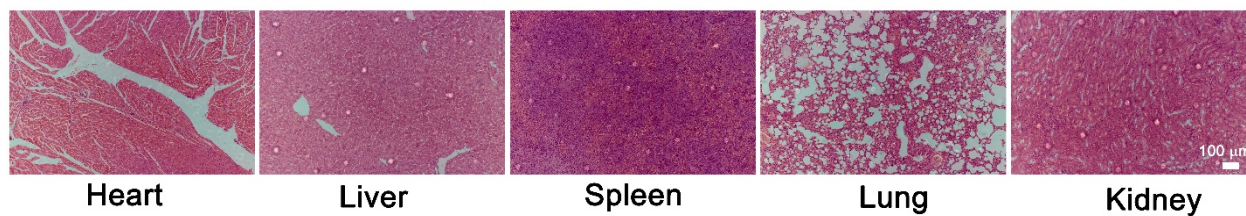

**Fig. S6.** H&E staining images of major organs of mice 24 h after the intravenous injection of AMB-1.
